# Supplementary material for: Patient and carer perceptions of video, telephone and in-person clinics for Phenylketonuria (PKU)
Source: PubMed Central journal article supplement (PMC11337755; doi:10.1186/s13023-024-03295-7), 2024-08-20
Supplement: 13023_2024_3295_MOESM1_ESM.pdf [file 13023_2024_3295_MOESM1_ESM.pdf]

## *Patient and family perceptions of PKU clinics*

1. Please tick one of the options below

- I am an adult (18 years or over) with PKU
- I am a parent/carer of an adult with PKU (18 years and over)
- I am a parent/carer of a child with PKU (under 18 years)
- I am under 18 years with PKU
- None of the above

2. Is the person with PKU a UK resident

- Yes
- No

3. Do you speak English as your first language?

- Yes
- No

4. Do you require a translator during hospital clinic reviews?

- Yes
- No

5. How old is the person with PKU?

- Less than 12y
- 12-18y
- 19-30y
- 31-50y
- 51-60y
- Over 60y

6. Please select the service you attend

- Adult services
- Paediatric services

7. What is the sex of the person with PKU?

- Male
- Non-binary
- Other
- Female
- Prefer not to say

8. Prior to March 2020, did you attend clinic reviews at hospital with a PKU metabolic team?

Yes

No

Other

8.a. If you selected other, please specify:

9. Have you attended any face-to-face clinic reviews for PKU care?

Yes

No

10. At your clinic visits, do you always see and speak to a doctor?

Yes

No

Sometimes

Don't know

10.a. Please comment

11. How many health professionals are present in the room when you see the doctor in the clinic?

1

3

5

Other

2

4

6+

11.a. If you selected Other, please specify:

12. Please select health professionals present in the room (tick all that apply)

Doctor

Dietitian

Biochemist

Other

Nurse

Psychologist

Trainees

12.a. If you selected Other, please specify:

13. How do you feel about the number of people present in the room?

14. Please select the health professionals you normally talk to at the clinic review

- Doctor       Dietitian       Biochemist  
 Nurse       Psychologist       Other

14.a. If you selected Other, please specify:

15. Please tick which of the following are done during the clinic review (tick all that apply)

- Height measured  
 Weight measured  
 Blood samples taken to check your nutrition e.g. iron levels  
 Blood pressure check  
 Opportunity to discuss symptoms or concerns  
 Physical examination by doctor  
 Psychometric testing with a psychologist  
 Other

15.a. If you selected Other, please specify:

16. Are sensitive topics discussed during your face-to-face review? (e.g. Drugs, alcohol, sexual health)

- Yes       No       Not applicable

16.a. Please comment

17. Are you usually given samples of low protein foods or protein substitute?

Yes                       No                       Don't know

18. How long on average do face-to-face clinic reviews last?

Up to 15 min     30 min – 1 hour     Over 2 hours     Other  
 Up to 30 min     1-2 hours             Don't know

18.a. If you selected Other, please specify:

19. To what extent do you find face-to-face clinic reviews useful? (e.g. able to discuss health needs and problems, ask questions, get practical advice, receive support and reassurance?)

Very useful     Neutral             Don't know  
 Useful             Not useful

19.a. Please comment

20. To what extent do you feel stressed or relaxed during the face-to-face clinic reviews?

Stressful             Neutral             Very relaxed  
 Slightly stressful     Relaxed             Don't know

20.a. Please comment

21. Using the scale below, how easy or difficult is it to travel to the face to face clinics reviews (e.g. transport available, distance to clinic) Please tick.

Very difficult     Neutral             Very easy  
 Difficult             Easy                 Don't know

21.a. Please comment

22. Please select which best describes the travel costs/parking charges associated with face-to-face clinic reviews.

Expensive       Acceptable costs       No costs       Don't know

22.a. Please comment

23. Please give your opinion on the time length of the clinic reviews.

Clinic too long       Clinic just right       Clinic too short       Don't know

23.a. Please comment

24. Please give your overall comments about the face to face review service.

25. Have you attended online video clinics for PKU care?

Yes       No

26. At your video clinic reviews, do you always see and speak to a doctor?

Yes       No       Don't know

26.a. Please comment

27. How many health professionals are in the same room as your doctor during your video clinic reviews? (Please tick)

- 1                       3                       5                       Other  
 2                       4                       6+

27.a. If you selected Other, please specify:

27.b. How do you feel about this?

28. Please select health professionals present in the video link during the clinic (tick all that apply)

- Doctor                       Dietitian                       Biochemist                       Other  
 Nurse                       Psychologist                       Trainees

28.a. If you selected Other, please specify:

29. Are sensitive topics discussed during your video clinic review (e.g., Drugs, alcohol, sexual health).

- Yes                       No

29.a. Please comment

30. How long, on average, do your video clinic reviews last? (this includes talking to all of the PKU team)

- Up to 15 min                       30 min – 1 hour                       Over 2 hours                       Other  
 Up to 30 min                       1-2 hours                       Don't know

30.a. If you selected Other, please specify:

31. To what extent do you find the online virtual video clinics useful? (ability to discuss health needs, ask questions and get practical advice?)

- Very useful       Neutral       Don't know  
 Useful       Not useful

31.a. Please comment

32. To what extent do you feel stressed or relaxed during the video clinic reviews?

- Stressful       Neutral       Very relaxed  
 Slightly stressful       Relaxed       Don't know

32.a. Please comment

33. Please give your opinion on the length of the video clinic reviews.

- Clinic too long       Clinic just right       Clinic too short       Don't know

33.a. Please comment

34. Do you experience any of the following technical problems with video clinic reviews?

- Difficult to establish online connection
- Difficult to access by phone connection
- Technical issues with online device used e.g., computer
- Technical issues with internet connection
- Cannot see all the health professionals involved in the consultation
- Cannot hear all health professionals involved in the consultation
- Difficulty with technology at home to allow a videocall (e.g., internet, laptop or tablet).
- No difficulties
- Other

| Yes | No | Don't Know | N/A |
|-----|----|------------|-----|
|     |    |            |     |
|     |    |            |     |
|     |    |            |     |
|     |    |            |     |
|     |    |            |     |
|     |    |            |     |
|     |    |            |     |
|     |    |            |     |

34.a. If other, please specify

35. Please give your overall comments on the video clinic reviews.

36. Have you attended any telephone reviews for PKU care?

Yes

No

36.a. Please comment

37. For your telephone reviews, do you always speak to a doctor?

Yes

No

Don't know

37.a. Please comment

38. How many health professionals are on the same call as the doctor during your telephone review? (Please tick)

1

3

5

Other

2

4

6+

38.a. If you selected Other, please specify:

38.b. How do you feel about the number of health professionals on the call?

39. Please select health professionals present on the call (tick all that apply)

Doctor

Dietitian

Biochemist

Other

Nurse

Psychologist

Trainees

39.a. If you selected Other, please specify:



40. Are sensitive topics discussed during your telephone review (e.g., Drugs, alcohol, sexual health).

- Yes                       No                       Not applicable

40.a. Please comment

41. How long, on average, are the telephone clinic reviews? (this includes talking to all of the PKU team)

- Up to 15 min     30 min – 1 hour     Over 2 hours     Other  
 Up to 30 min     1-2 hours             Don't know

41.a. If you selected Other, please specify:

42. Do you experience any of the following technical problems with telephone reviews?

|                                                                                                 | Yes | No | Don't Know | N/A |
|-------------------------------------------------------------------------------------------------|-----|----|------------|-----|
| Difficult to access by phone connection                                                         |     |    |            |     |
| Cannot hear all health professionals involved in the consultation                               |     |    |            |     |
| Difficulty at home to allow a telephone call (e.g., no landline, no mobile, phone not working). |     |    |            |     |
| No difficulties                                                                                 |     |    |            |     |
| Other                                                                                           |     |    |            |     |

42.a. If other, please specify

43. To what extent do you find the telephone clinics useful? (ability to discuss health needs, ask questions and get practical advice?)

- Very useful     Neutral             Don't know  
 Useful             Not useful

43.a. Please comment

44. To what extent do you feel stressed or relaxed during the video clinic reviews?

- Stressful       Neutral       Very relaxed  
 Slightly stressful       Relaxed       Don't know

44.a. Please comment

45. Please give your opinion on the length of the video clinic reviews.

- Clinic too long       Clinic just right       Clinic too short       Don't know

45.a. Please comment

46. Please give your overall comment on the telephone review service.

47. How would you prefer to attend clinics in the future?

- Face-to-face only  
 Online virtual video only  
 Online telephone only  
 Mixture of face-to-face, virtual video and telephone  
 Don't know  
 Other

47.a. If you selected Other, please specify
